# Supplementary material for: Orthogonal light-triggered multiple effects based on photochromic nanoparticles for DNA cleavage and beyond
Source: Royal Society of Chemistry journal article supplement (doi:10.1039/d2tb02638d), 2023-01-01
Supplement: d2tb02638d1.pdf [file d2tb02638d1.pdf]

## Supporting information

### Orthogonal light-triggered multiple effects based on photochromic nanoparticles for DNA cleavage and beyond

Lizhi Jiao,<sup>‡a</sup> Qisi Li,<sup>‡a</sup> Chenming Li,<sup>a</sup> Jinhui Gu,<sup>a</sup> Xinping Liu,<sup>b</sup> Shuijian He<sup>c</sup> and Zhijun Zhang<sup>\*a</sup>

<sup>a</sup> Department of Chemistry, Key Laboratory of Surface & Interface Science of Polymer Materials of Zhejiang Province, Zhejiang Sci-Tech University, Hangzhou 310018, China.

<sup>b</sup> School of Pharmaceutical Science, University of South China, Hengyang 421001, China.

<sup>c</sup> Co-Innovation Center of Efficient Processing and Utilization of Forest Resources, International Innovation Center for Forest Chemicals and Materials, College of Materials Science and Engineering, Nanjing Forestry University, Nanjing, 210037 China.

\* Corresponding authors:

E-mail: [zjzhang@zstu.edu.cn](mailto:zjzhang@zstu.edu.cn) (Z. Z.)

‡ These authors contribute equally.

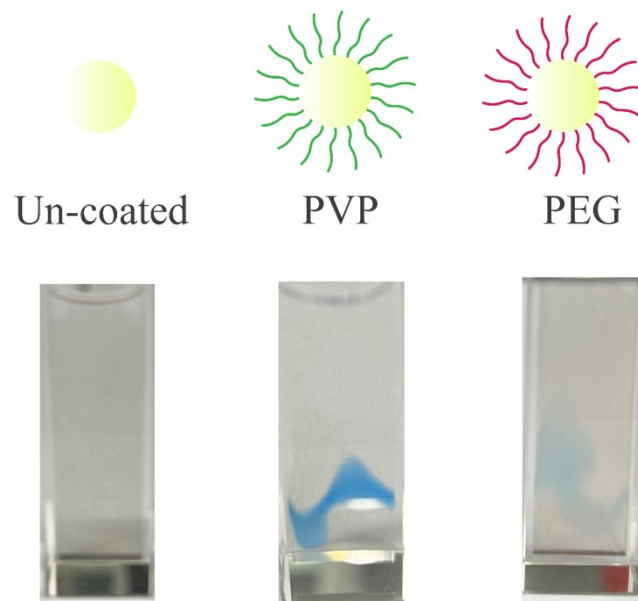

**Figure S1.** Photographs show the photochromic behaviors of WO<sub>3</sub> with different protective agents. Irradiation with 0.15 W 405 nm light for 1 min.

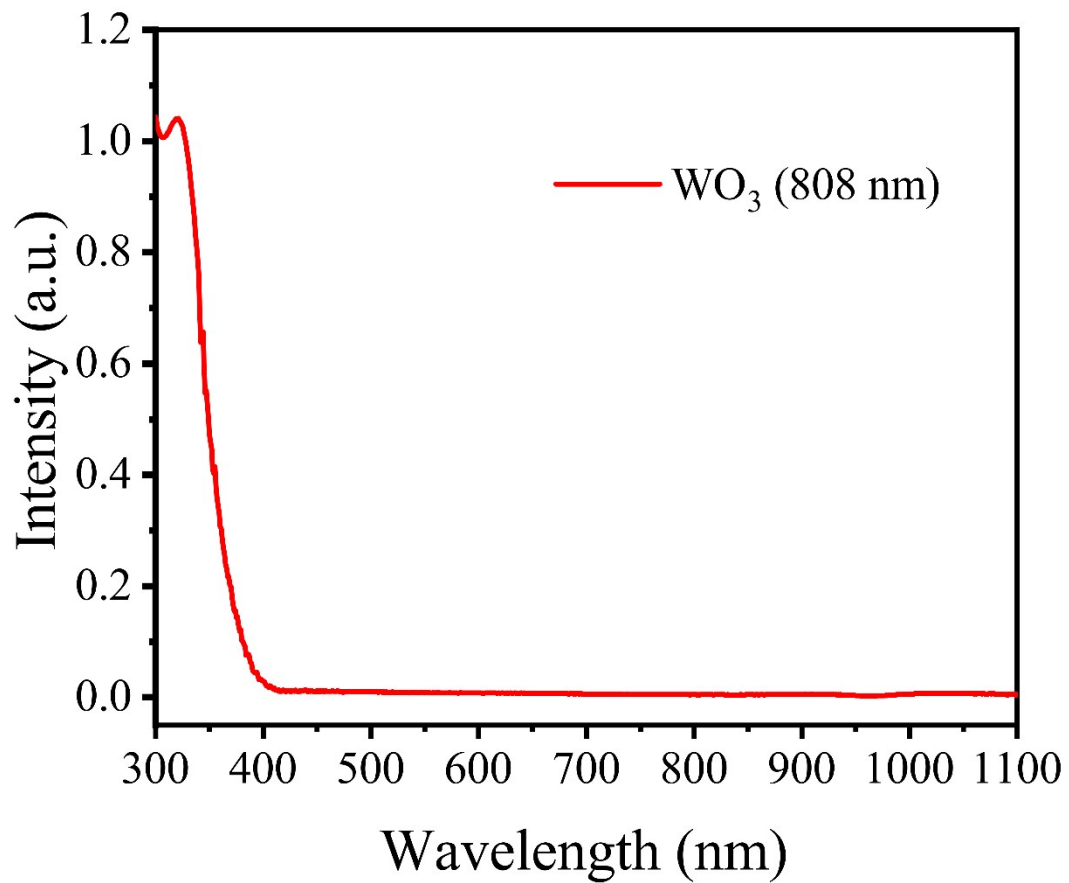

Figure S2. UV-vis spectra of  $\text{WO}_3$  after it irradiated by 808 nm laser.

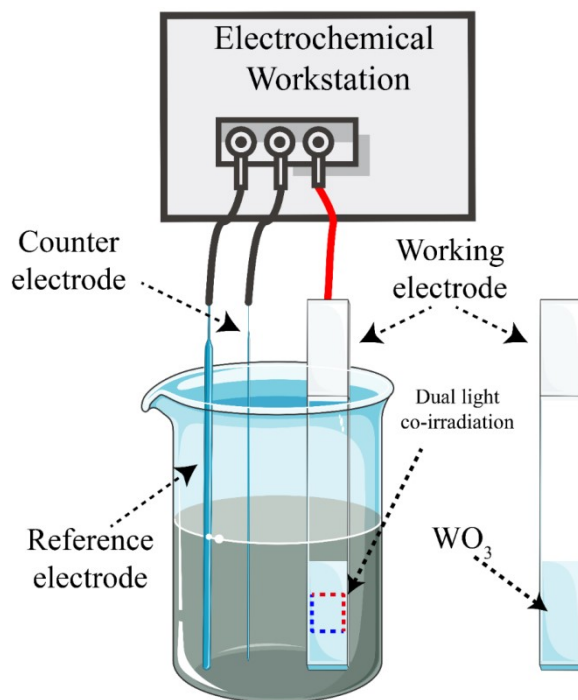

Figure S3. The diagram of the homemade photoelectrochemical device.

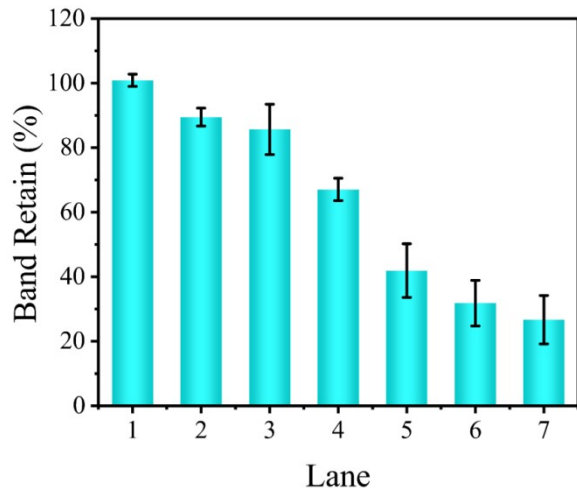

**Figure S4.** The corresponding statistical results of Figure 3c.

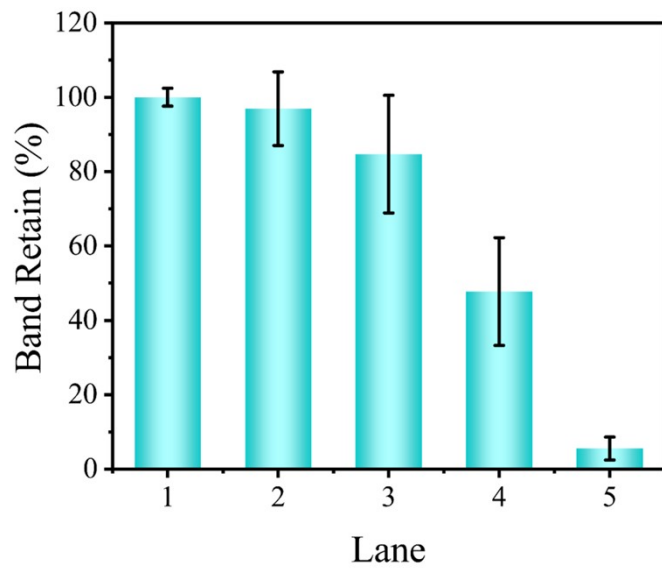

**Figure S5.** The corresponding statistical results of Figure 3d.

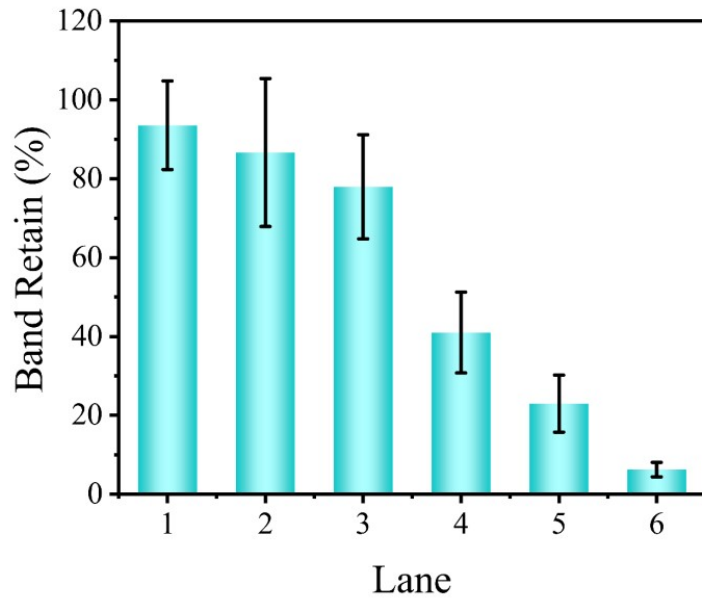

**Figure S6.** The corresponding statistical results of Figure 3e.

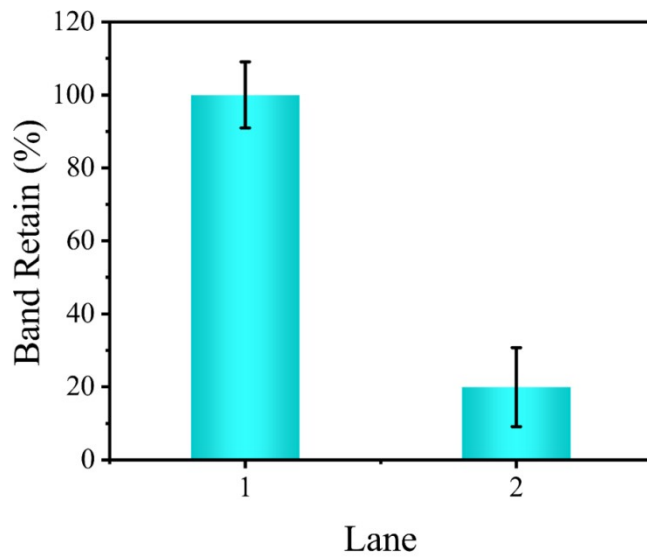

**Figure S7.** The corresponding statistical results of Figure 3f.

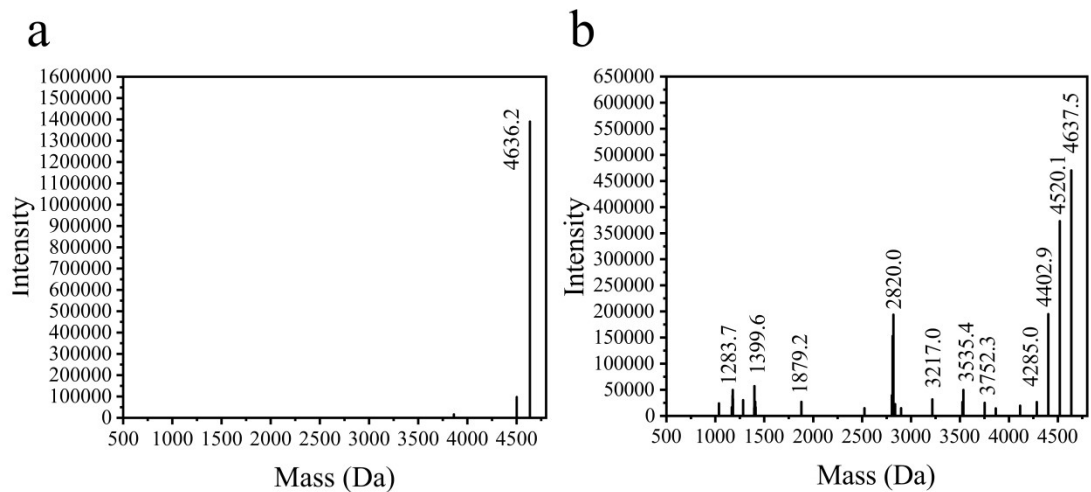

**Figure S8.** Mass spectrometry analysis of the ssDNA before (a) and after (b) cleavage.

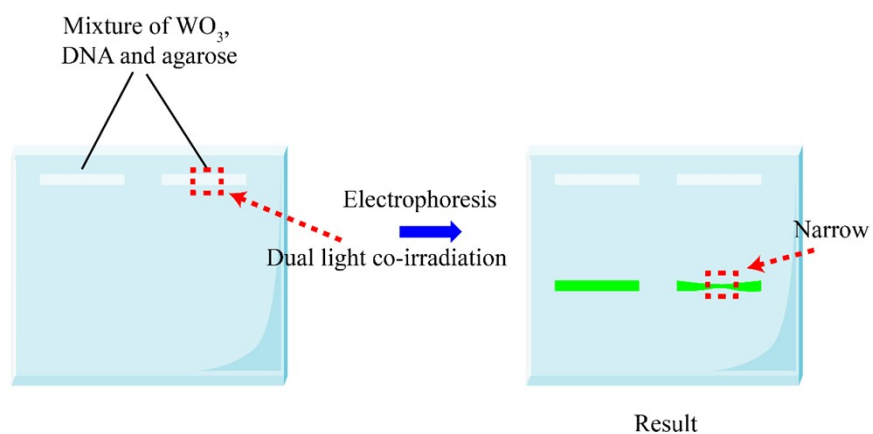

**Figure S9.** The diagram of spatiotemporal controllability experiment.

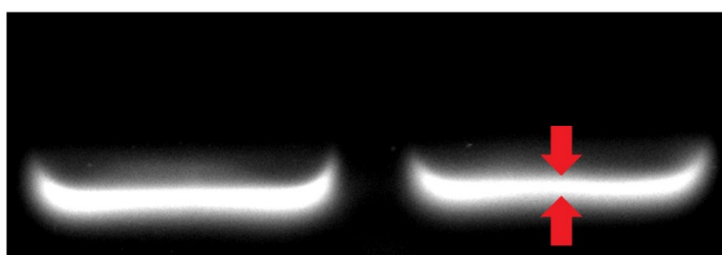

**Figure S10.** Agarose gel micrographs of spatiotemporal controllability experiment, the red arrows indicate the dual light co-irradiation region.

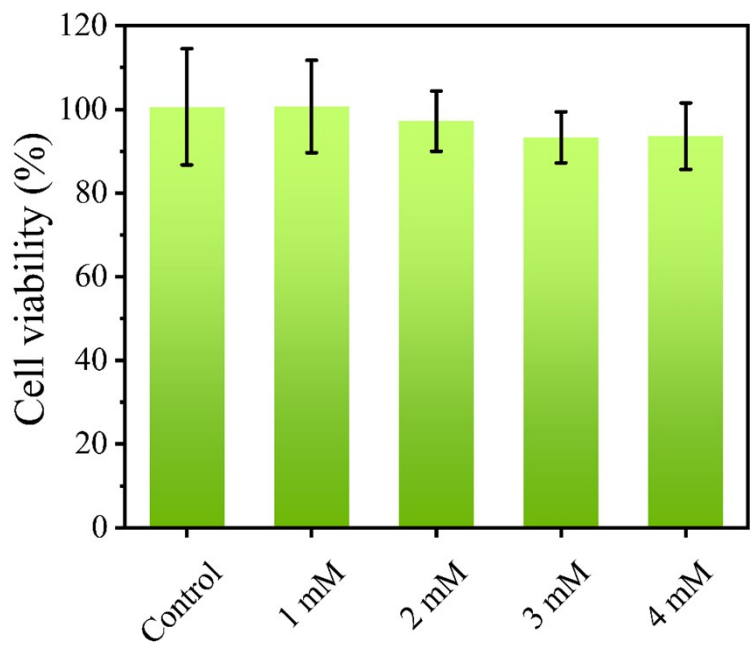

**Figure S11.** MTT experiment to detect the cytotoxicity of  $\text{WO}_3$  with different concentrations.

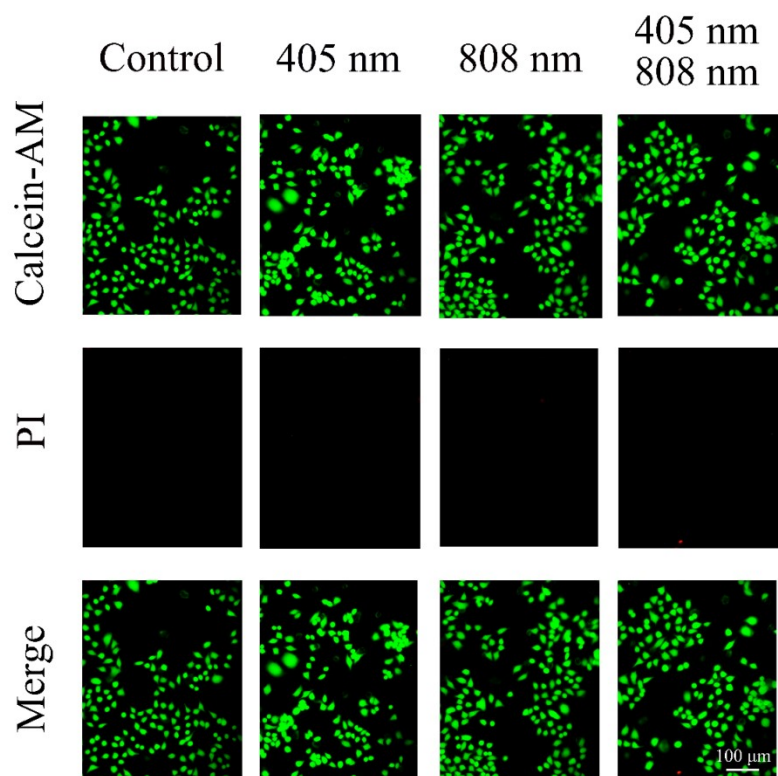

**Figure S12.** Fluorescence images of HeLa cells incubated with various groups containing calcein-AM (green) and propidium iodide (red). All groups were un-incubated with  $\text{WO}_3$ . 1 W 808 nm laser and 0.15 W 405 nm laser,

irradiation

time

20

min.

Equations indicate the mechanism of photochromic effect:

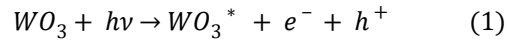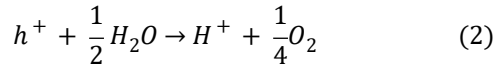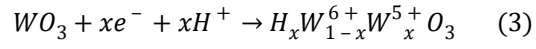

WO<sub>3</sub>\* means excited state.

Equations of photothermal conversion efficiency ( $\eta$ ) calculation:

$$\eta = \frac{hS(T_{max} - T_{surr}) - Q_0}{I(1 - 10^{-A_{808nm}})} \quad (4)$$

$$\tau_s = \frac{m_d C_d}{hS} \quad (5)$$

$$Q_0 = hS(T_{max,water} - T_{surr}) \quad (6)$$

$$\theta = \frac{T_t - T_{surr}}{T_{max} - T_{surr}} \quad (7)$$

The value of  $\tau_s$  was slope, which obtained by linearly fitting the plot of the cooling time  $t$  versus the term  $-\ln\theta$ .  $m_d$  is the mass of the nanoparticle solution and  $C_d \approx 4.2 \text{ J}\cdot\text{g}^{-1}\cdot\text{K}^{-1}$ (heat capacity of water).  $T_{max}$  is the equilibrium temperature (the highest temperature of solution under irradiation),  $T_{max,water}$  is the maximum temperature of water under irradiation.  $T_{surr}$  is the surrounding ambient temperature.  $T_t$  is the temperature of solution in time  $t$ .
